# Supplementary material for: Concentric zones, cell migration and neuronal circuits in the Drosophila visual center
Source: Oxford University Press journal article supplement (doi:10.1242/dev.058370), 2011-02-08

A.

|                | hth-Gal4<br>ctrl | hth-Gal4<br>mutant | hth-Gal<br>UAS-hth | bsh-Gal4<br>ctrl | bshGal4<br>hth <sup>P2</sup> | bsh-Gal4 hth <sup>P2</sup><br>UAS-hth |
|----------------|------------------|--------------------|--------------------|------------------|------------------------------|---------------------------------------|
| Mi1            | 115              | 0                  | 33                 | 138              | 15                           | 34                                    |
| abnormal Mi1   | 0                | 3                  | 3                  | 0                | 8                            | 0                                     |
| La wfl1        | 15               | 0                  | 0                  | 0                | 0                            | 0                                     |
| La wfl2        | 0                | 1                  | 0                  | 0                | 0                            | 0                                     |
| Pm3            | 2                | 0                  | 0                  | 0                | 0                            | 0                                     |
| Mi(1-3) lamina | 0                | 5                  | 0                  | 0                | 0                            | 0                                     |
| Other Mi       | 0                | 1                  | 0                  | 0                | 0                            | 0                                     |
| Tm1(a)-like    | 0                | 2                  | 0                  | 0                | 57                           | 35                                    |
| Tm2-like       | 0                | 1                  | 0                  | 0                | 0                            | 0                                     |
| Tm3-like       | 0                | 24                 | 4                  | 0                | 0                            | 2                                     |
| Tm4-like       | 0                | 4                  | 0                  | 0                | 0                            | 0                                     |
| Tm5-like       | 0                | 1                  | 0                  | 0                | 2                            | 1                                     |
| Tm6-like       | 0                | 0                  | 1                  | 0                | 0                            | 0                                     |
| Tm9-like       | 0                | 3                  | 1                  | 0                | 0                            | 0                                     |
| Tm11-like      | 0                | 1                  | 0                  | 0                | 0                            | 0                                     |
| Tm12-like      | 0                | 4                  | 0                  | 0                | 0                            | 0                                     |
| Tm13-like      | 0                | 8                  | 1                  | 0                | 0                            | 0                                     |
| Tm14-like      | 0                | 1                  | 0                  | 0                | 0                            | 1                                     |
| Tm20-like      | 0                | 4                  | 0                  | 0                | 0                            | 0                                     |
| Other Tm       | 0                | 10                 | 2                  | 0                | 5                            | 5                                     |
| TmY3-like      | 0                | 2                  | 0                  | 0                | 0                            | 0                                     |
| Other TmY      | 0                | 1                  | 0                  | 0                | 1                            | 2                                     |
| Others         | 0                | 3                  | 0                  | 0                | 0                            | 1                                     |
| Total          | 132              | 79                 | 45                 | 138              | 88                           | 81                                    |

B. hth<sup>P2</sup> MARCM clone

Elav Pros GFP

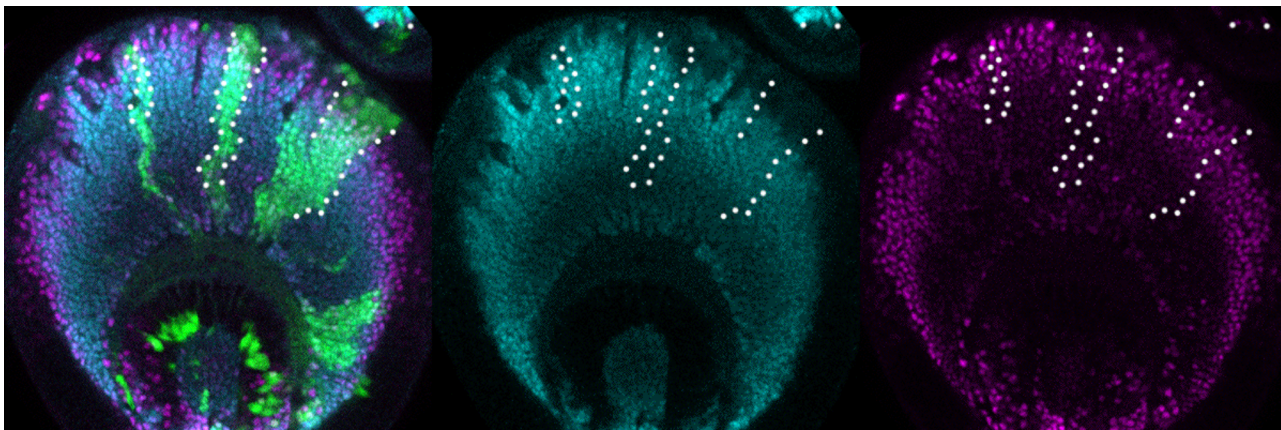

Supplement: dev058370figs3.pdf [file dev058370figs3.pdf]
