# Supplementary material for: Concentric zones, cell migration and neuronal circuits in the Drosophila visual center
Source: Oxford University Press journal article supplement (doi:10.1242/dev.058370), 2011-02-08
Supplement: dev058370figs1.pdf [file dev058370figs1.pdf]

A.

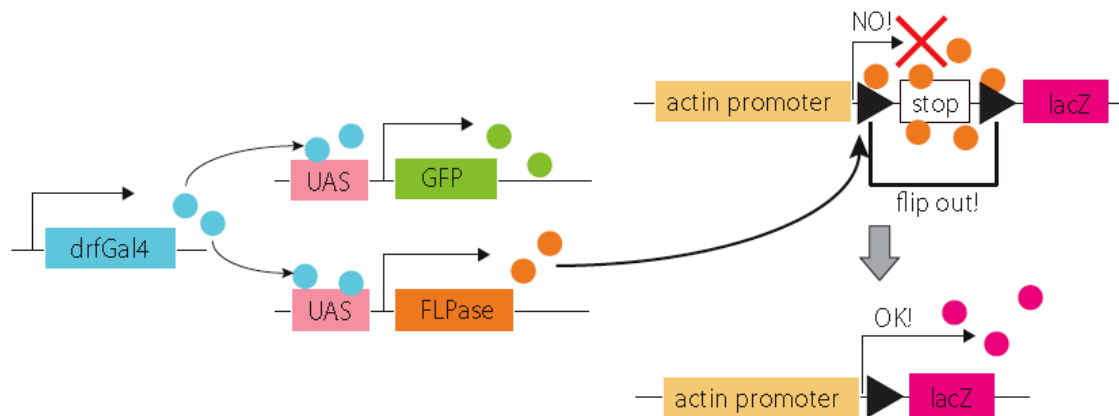

B.

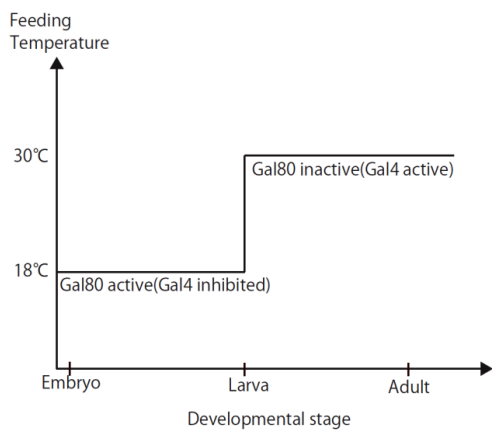

C.

| Fly   | lacZ positive | lacZ,GFP positive |
|-------|---------------|-------------------|
| 1     | 63            | 63                |
| 2     | 52            | 52                |
| 3     | 55            | 55                |
| 4     | 51            | 51                |
| 5     | 66            | 66                |
| Total | 287           | 287               |

D.

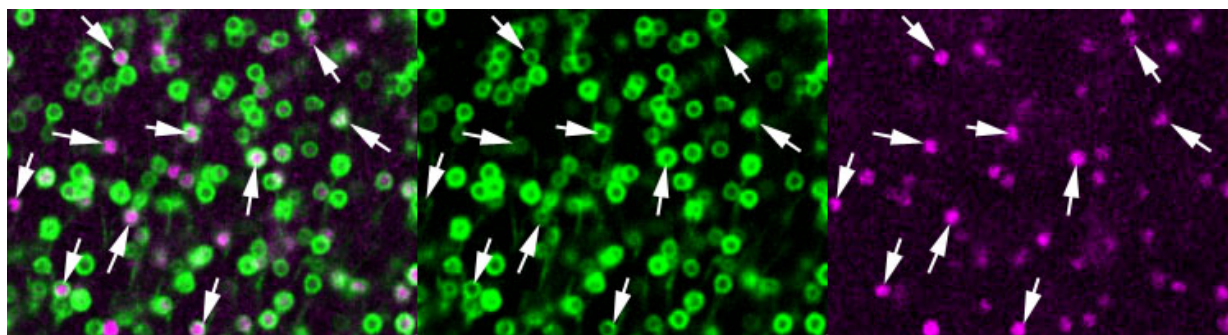

*UAS-flp; Gal80<sup>ts</sup>; drf-Gal4 UAS-CD8GFP / act>stop>lacZ* GFP LacZ
