# Supplementary material for: Concentric zones, cell migration and neuronal circuits in the Drosophila visual center
Source: Oxford University Press journal article supplement (doi:10.1242/dev.058370), 2011-02-08

A.

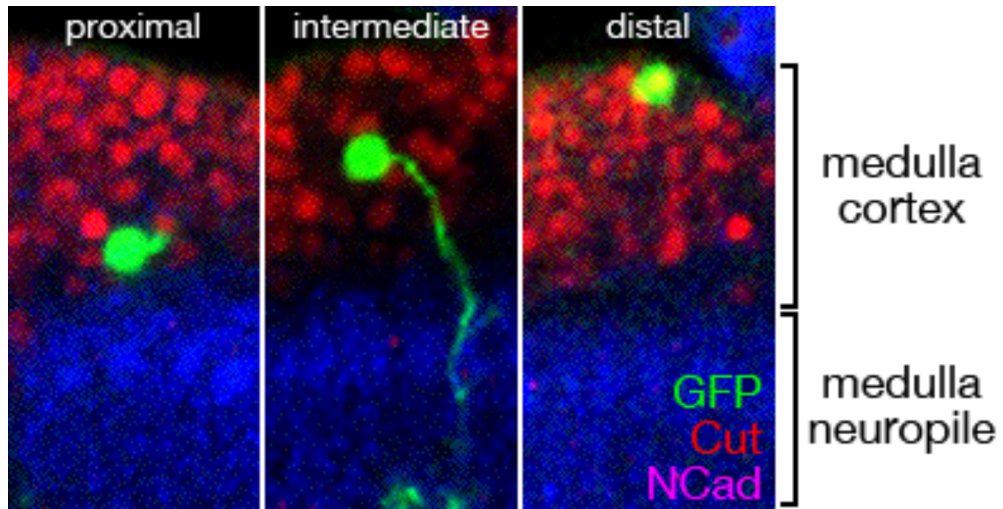

B.

| Neuronal type | Proximal | Intermediate | Distal | n  | Cut | Dac | Drf |
|---------------|----------|--------------|--------|----|-----|-----|-----|
| Mi10b         | 0        | 2            | 7      | 9  | ++  | -   | +++ |
| Tm3a          | 0        | 1            | 19     | 20 | ++  | -   | +++ |
| Tm3b          | 0        | 0            | 9      | 10 | ++  | -   | +++ |
| Dm8a          | 0        | 2            | 7      | 9  | -   | +   | +   |
| Tm9           | 2        | 16           | 2      | 20 | +   | +   | ++  |
| Dm8b          | 0        | 8            | 3      | 11 | -   | +   | +   |
| TmY3          | 1        | 17           | 6      | 24 | -   | -   | +++ |
| Tm27Y         | 8        | 16           | 1      | 25 | -   | -   | +++ |
| Tm27          | 7        | 4            | 0      | 11 | -   | -   | +++ |

C. Dac Drf

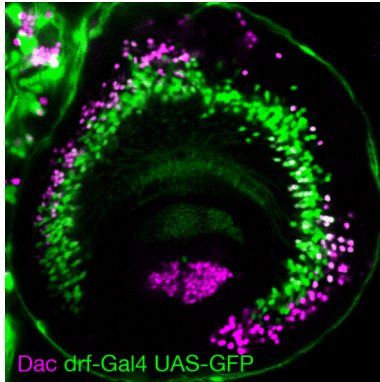

D. Cut Drf

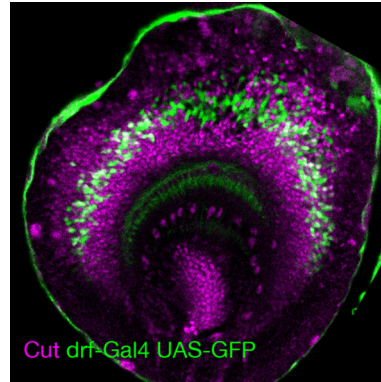

Supplement: dev058370figs4.pdf [file dev058370figs4.pdf]
