# Supplementary material for: Concentric zones, cell migration and neuronal circuits in the Drosophila visual center
Source: Oxford University Press journal article supplement (doi:10.1242/dev.058370), 2011-02-08

A. NP2646 UAS-CD8GFP  
Drf

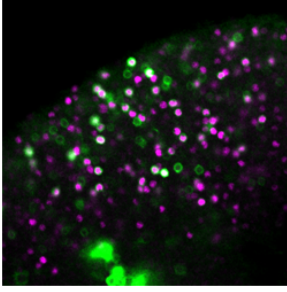

B.

| neuronal type            | control    | <i>drf<sup>E82</sup></i> | Drf        |
|--------------------------|------------|--------------------------|------------|
| <b>Tm27Y</b>             | <b>66</b>  | <b>0</b>                 | <b>++</b>  |
| <b>abnormal Tm27Y</b>    | <b>0</b>   | <b>69</b>                | <b>+/-</b> |
| Tm27                     | 8          | 0                        | ++         |
| abnormal Tm27            | 0          | 9                        | +/-        |
| Tm5(Y)-like              | 39         | 84                       | -          |
| Tm24(Y)-like             | 11         | 16                       | -          |
| Tm8-like                 | 5          | 36                       | -          |
| Tm20-like                | 5          | 7                        | -          |
| Tm <sub>3,8</sub> Y-like | 7          | 19                       | -          |
| Tm <sub>3,6</sub> -like  | 5          | 5                        | -          |
| Other neurons            | 2          | 1                        | -          |
| <b>Total</b>             | <b>148</b> | <b>246</b>               |            |

C. ectopic arborizations at M2-3

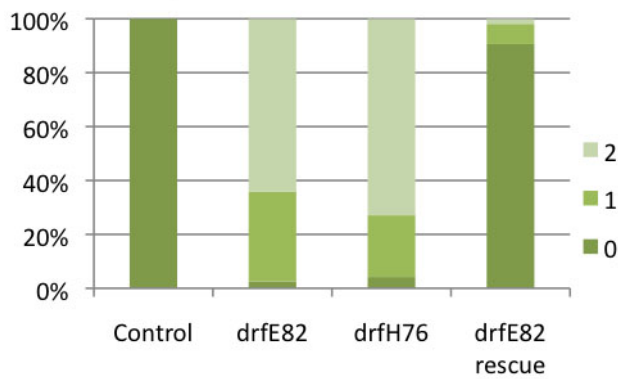

D. reduced arborizations at M8-10

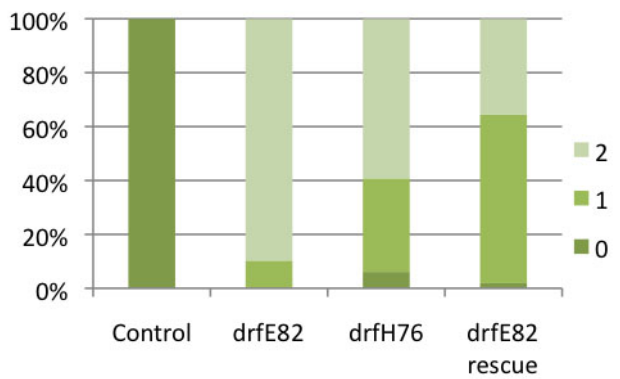

E. over shooting in the lobula

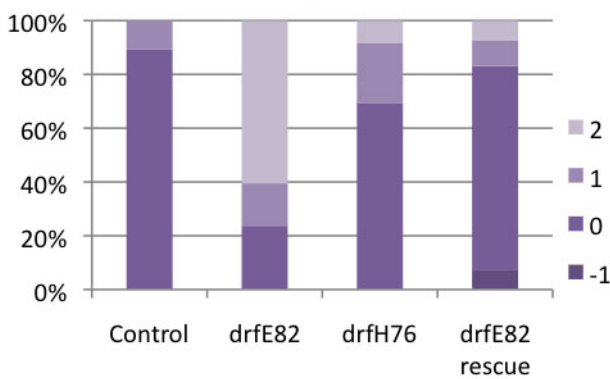

F. ectopic branches in the lobula

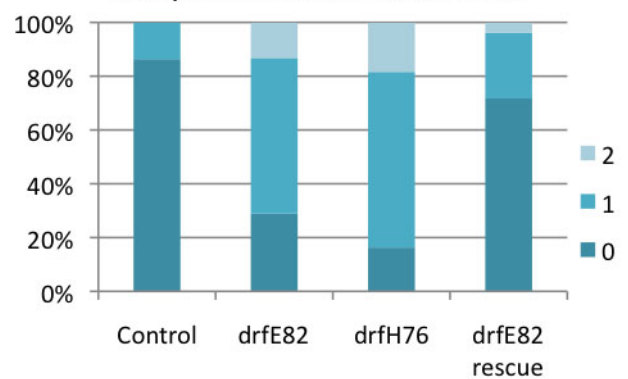

G.

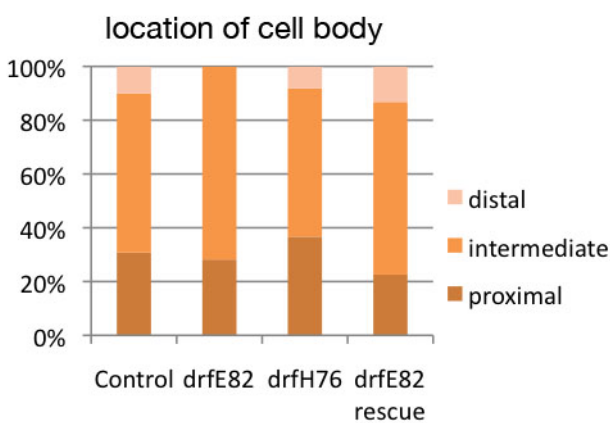

Supplement: dev058370figs5.pdf [file dev058370figs5.pdf]
