# Supplementary material for: Concentric zones, cell migration and neuronal circuits in the Drosophila visual center
Source: Oxford University Press journal article supplement (doi:10.1242/dev.058370), 2011-02-08
Supplement: dev058370tables1.pdf [file dev058370tables1.pdf]

**Table S1. Primer list**

---

|                                    |                                                                                                    |
|------------------------------------|----------------------------------------------------------------------------------------------------|
| <b>Gal4</b><br><i>BamHI-Ascl</i>   | CAAGGCCTAAAG <b>GATCC</b> ATCAAAATGAAGCTACTGTCTTCTATCG<br>CAG <b>GCGCGCC</b> GAACTAGTGGATCTAAACGAG |
| <b>drfL</b><br><i>BsiWI-BamHI</i>  | CAG <b>TACG</b> TGCAGCTGATGATGATGCCTTCG<br>CAG <b>GATCC</b> GCCATCCCCACCGCTCTGGGGCT3               |
| <b>drfR</b><br><i>KpnI-NotI</i>    | CAG <b>GTA</b> CCGCAATCAGAAATCCAGGAGTCGAAC<br>CAG <b>GCGCCGCG</b> GAAACATTATAAACCACGCGCGCC3        |
| <b>hthL</b><br><i>BsiWI-BamHI</i>  | CAG <b>TACG</b> CGCTGGGCTTTAAATTCCCAGAA<br>CAG <b>GATCC</b> GTCCATGCCGTAGCCGTGTAGGC                |
| <b>hthR</b><br><i>KpnI-NotI</i>    | CAG <b>GTA</b> CCGCAATACCCGAAGTACACAAACG<br>CAG <b>GCGCCGCG</b> CATCAGGAGCTGAAGAAGCAGAAG           |
| <b>bshLz</b><br><i>BsiWI-BamHI</i> | CAT <b>CGTACG</b> GAGGATTACGGCAAGTCCAT<br>CAG <b>GATCC</b> GTGGTGGTTGGACCTACGAAGCA                 |
| <b>bshRz</b><br><i>KpnI-NotI</i>   | CAG <b>GTA</b> CCATCACAAGGTGAGTTAATGCTCG<br>CAT <b>GCGCCGCG</b> CAACCGCTTTTCCAGACCGGA              |
| <b>Kmr</b><br><i>Ascl-KpnI</i>     | CATGGCGCGCC <b>GAATCC</b> CTTAGAAAGCCACGTTGTGTC<br>CAT <b>GGTACC</b> GTTCGACCAGTTGGTGATTTTG        |
| <b>bshLB</b><br><i>Ascl-BamHI</i>  | CAT <b>GCGCGCC</b> GAAATGGTTCGGCTTTCTCATC<br>CAT <b>GATCC</b> GGTTCGAAGCAATGACAAGTC3               |
| <b>bshRB</b><br><i>BamHI-Pacl</i>  | CAT <b>GATCC</b> CCCCGACTATCAGATACTCGT<br>CAT <b>TTAATTA</b> AAACGCTTGTGACAACGACGA                 |

---
