# Supplementary figures and images for: Concentric zones, cell migration and neuronal circuits in the Drosophila visual center
Source: Oxford University Press journal article supplement (doi:10.1242/dev.058370), 2011-02-08

A.

NP6013 UAS-CD8GFP

Hth

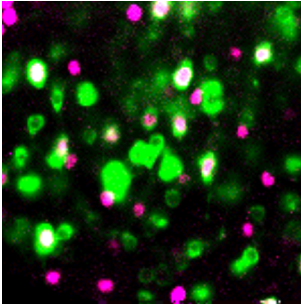

B.

|         | hth-Gal4 | NP6013 | Bsh | Hth |
|---------|----------|--------|-----|-----|
| Mi1     | 94       | 7      | +   | +   |
| La wfl1 | 5        | 0      | -   | +   |
| La wfl2 | 0        | 11     | -   | +   |
| Pm3     | 2        | 0      | -   | +   |
| total   | 101      | 18     |     |     |

Supplement: dev058370figs2.pdf [file dev058370figs2.pdf]
